# Supplementary material for: Collagen Ⅰ-DDR1 signaling promotes hepatocellular carcinoma cell stemness via Hippo signaling repression
Source: Research Square preprint supplement (doi:10.21203/rs.3.rs-1734316/v1), 2022-06-14
Supplement: Supplementary file 1 [file 41c7d17668ec61438e243667.docx]

**Supplementary Table 2. Correlation between DDR1 Expression with Clinicopathologic Features in HCC (n=123).**

| Clinicopathological features | Relative DDR1 expression | | p value |
| --- | --- | --- | --- |
| low | high | (χ2 test) |
|  |  |  |  |
| Gender |  |  | 0.698 |
| Female | 5 | 13 |  |
| Male | 34 | 71 |  |
| Age, year |  |  | 0.616 |
| ≤50 | 20 | 39 |  |
| >50 | 19 | 45 |  |
| TBIL, μmol/L |  |  | 0.719 |
| ≤12.25 | 19 | 38 |  |
| >12.25 | 20 | 46 |  |
| ALT, U/L |  |  | 0.494 |
| ≤26 | 16 | 40 |  |
| >26 | 23 | 44 |  |
| ALB, g/dL |  |  | 0.579 |
| ≤40.1 | 24 | 56 |  |
| >40.1 | 15 | 28 |  |
| AFP, μg/L |  |  | 0.156 |
| ≤400 | 23 | 38 |  |
| >400 | 16 | 46 |  |
| GGT, U/L |  |  | 0.074 |
| ≤54 | 23 | 35 |  |
| >54 | 16 | 49 |  |
| HBsAg |  |  | NA |
| Negtive | 0 | 0 |  |
| Postive | 39 | 84 |  |
| HBcAb |  |  | NA |
| Negtive | 0 | 0 |  |
| Postive | 39 | 84 |  |
| AntiHCV |  |  | 0.575 |
| Negtive | 38 | 83 |  |
| Postive | 1 | 1 |  |
| Tumor size, cm |  |  | 0.068 |
| <5 | 15 | 19 |  |
| ≥5 | 24 | 65 |  |
| Tumor number |  |  | 0.711 |
| Single | 30 | 62 |  |
| Multiple | 9 | 22 |  |
| Child-Pugh class |  |  | 0.124 |
| A | 38 | 75 |  |
| B | 1 | 9 |  |
| Differention |  |  | <0.001 |
| Poor/Moderate | 16 | 74 |  |
| Well | 23 | 10 |  |
| BCLC |  |  | <0.001 |
| 0+A | 38 | 61 |  |
| B+C | 1 | 23 |  |
| TNM Stage |  |  | 0.011 |
| Ⅰ | 29 | 42 |  |
| Ⅱ+Ⅲ+Ⅳ | 10 | 42 |  |
| Cirrhosis |  |  | 0.034 |
| Mild | 27 | 41 |  |
| Medium/Servere | 12 | 43 |  |
| Distant metastasis |  |  | 0.12 |
| Ngetive | 39 | 79 |  |
| Postive | 0 | 5 |  |
| Recurrence |  |  | 0.001 |
| No | 21 | 19 |  |
| Yes | 18 | 65 |  |
| survival |  |  | 0.003 |
| No | 25 | 30 |  |
| Yes | 14 | 54 |  |

Tumor size was measured by the length of the largest tumor nodule.

Fisher exact test.
