# Supplementary material for: Collagen Ⅰ-DDR1 signaling promotes hepatocellular carcinoma cell stemness via Hippo signaling repression
Source: Research Square preprint supplement (doi:10.21203/rs.3.rs-1734316/v1), 2022-06-14
Supplement: Supplementary file 2 [file d8fe4cae5cd1b463d837646a.docx]

**Supplementary Table 4. The sequences of siRNA and shRNA oligo pairs.**

| **Identifier** | **Sequence (5’ to 3’)** |
| --- | --- |
| DDR1-siRNA sense | GTATTTATCTGAGGCCGTGTA |
|  |  |
| DDR2-siRNA sense | CGCCAGATTTGTTCGCCTTAT |
|  |  |
| ITGB1-siRNA sense | GCCTTGCATTACTGCTGATAT |
|  |  |
| ITGA1-siRNA sense | CCCTAGATTCACTAAGACAAA |
|  |  |
| ITGA2-siRNA sense | CCGGCCAGATAGTGCTATATA |
|  |  |
|  |  |
| DDR1-shRNA#1 sense | CCGGACTCCACCTATGACGGACATACTCGAGTATGTCCGTCATAGGTGGAGTTTTTTG |
| DDR1-shRNA#1 antisense | AATTCAAAAAACTCCACCTATGACGGACATACTCGAGTATGTCCGTCATAGGTGGAGT |
|  |  |
| DDR1-shRNA#2 sense | CCGGCCTATACGTTTCTGTGGAGTACTCGAGTACTCCACAGAAACGTATAGGTTTTTG |
| DDR1-shRNA#2 antisense | AATTCAAAAACCTATACGTTTCTGTGGAGTACTCGAGTACTCCACAGAAACGTATAGG |
|  |  |
| CD44-shRNA#1 sense | CCGGCCGTTGGAAACATAACCATTACTCGAGTAATGGTTATGTTTCCAACGGTTTTT |
| CD44-shRNA#1 antisense | AATTAAAAACCGTTGGAAACATAACCATTACTCGAGTAATGGTTATGTTTCCAACGG |
|  |  |
| CD44-shRNA#2 sense | CCGGGCCCTATTAGTGATTTCCAAACTCGAGTTTGGAAATCACTAATAGGGCTTTTT |
| CD44-shRNA#2 antisense | AATTAAAAAGCCCTATTAGTGATTTCCAAACTCGAGTTTGGAAATCACTAATAGGGC |
|  |  |
