# Supplementary material for: Collagen Ⅰ-DDR1 signaling promotes hepatocellular carcinoma cell stemness via Hippo signaling repression
Source: Research Square preprint supplement (doi:10.21203/rs.3.rs-1734316/v1), 2022-06-14
Supplement: Supplementary file 3 [file fbbdf00e7a1245f6d50bc31d.docx]

**Supplementary Table 5. Sequences of gene-specific primers used for qRT-PCR.**

| Gene | Forward (5’-3’) | Reverse (5’-3’) |
| --- | --- | --- |
| DDR1 | CCGACTGGTTCGCTTCTACC | CGGTGTAAGACAGGAGTCCATC |
| CD44 | CTGCCGCTTTGCAGGTGTA | CATTGTGGGCAAGGTGCTATT |
| SOX2 | TACAGCATGTCCTACTCGCAG | GAGGAAGAGGTAACCACAGGG |
| OCT4 | CAAAGCAGAAACCCTCGTGC | TCTCACTCGGTTCTCGATACTG |
| EPCAM | AATCGTCAATGCCAGTGTACTT | TCTCATCGCAGTCAGGATCATAA |
| CTGF | AGGAGTGGGTGTGTGACGA | CCAGGCAGTTGGCTCTAATC |
| CYR61 | AGCCTCGCATCCTATACAACC | TTCTTTCACAAGGCGGCACTC |
| BCL2 | GGTGGGGTCATGTGTGTGG | CGGTTCAGGTACTCAGTCATCC |
| AXL | ATCAGCTTCGGCTAGGCAG | TCCGCGTAGCACTAATGTTCT |
| GAPDH | GGAGCGAGATCCCTCCAAAAT | GGCTGTTGTCATACTTCTCATGG |
